# Supplementary material for: A stem cell marker KLF5 regulates CCAT1 via three-dimensional genome structure in colorectal cancer cells
Source: PubMed Central journal article supplement (PMC8727571; doi:10.1038/s41416-021-01579-4), 2021-10-27
Supplement: 41416_2021_1579_MOESM1_ESM.pdf [file 41416_2021_1579_MOESM1_ESM.pdf]

# Supplementary Figure S1

A

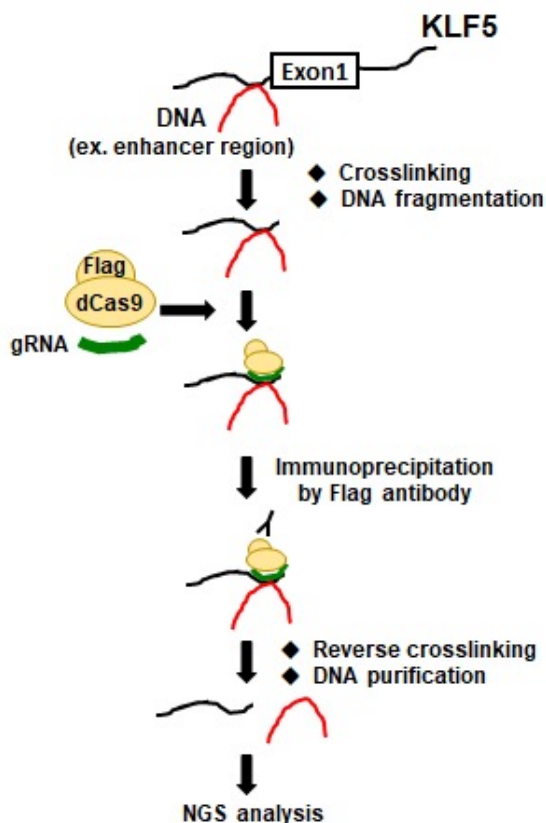

B

**gRNA-A**

-600 T TGTTAAACGGATACACTCAC TGCTAAAGATACACAGGGACAAGAGCTGT  
 TTTAAATTTGTTTATCACACCGCCCCTAGTTTTCTGCTAAAGAGAAGTAC

**gRNA-B**

-500 ATTTTGGATATTTAAAAGTACACTCATTAGACAAATCTCTAAAAGCCT  
 CAGCGCCCT TACCTAGCTGCCTTCTGGG TTCAGCTTTTGAGTTTCAGGT

-400 CCTTGCACAACACCTAAGACGTGCAATACTCTTTTTCTTCCTAATCCTGG  
 CAGAGAACAGTGCGAAGAGATCTCCCTCCGCGTCTCCACCCTAATCCCC

-300 CTCTTCCAGATTCCACCCGCTCCGCTACTTCCCTCCGCCCCGGCTCCG  
 CCAGCCCAATCTGTCAGAGAAGTTGTGTACAAACTGCGCGGCCGCCCTGC

-200 GCGCGAAGCTCGTGGCCCAGAGGGGTGCGGTGCGGCCGACGGAGGCGGG  
 GCCCTGGCTGCCTCTCTCCCTGCTCATAGGCTGGCCGCTCAGGCCTGGCC

-100 GGCCTCGGGCCTCGGGATTCGCGGCGGCGCTGCCAATCAGGCGATCGGG  
 CCCC GCCCCCCCGAGTTGGGTGAAATAGAGGCGGGCGTCAAGTGTCACT

+1  **KLF5**  
 AGTCGCGGGGCAGGTACGTGCGCTCGCGTTTCTCTCGCGAGGTGCGCGG

## Supplementary Figure S1.

A, Schematic illustration of the *in vitro* enChIP method.

B, Genomic sequence of the *KLF5* promoter region. The -600~+50 region is shown. The *KLF5* TSS and the target sequences of gRNAs for *in vitro* enChIP-seq are indicated.

# Supplementary Figure S2

**A**

|    | Chr   | Start     | End       | Summit    | <i>P</i> score | Closest Gene Symbol |
|----|-------|-----------|-----------|-----------|----------------|---------------------|
|    | chr13 | 73632293  | 73632792  | 73632537  |                | KLF5                |
| #1 | chr13 | 96216588  | 96216883  | 96216740  | 27.93          | CLDN10              |
| #2 | chr13 | 63217092  | 63217370  | 63217195  | 25.33          |                     |
| #3 | chr13 | 74003796  | 74004073  | 74003995  | 21.73          |                     |
|    | chr13 | 109564198 | 109564464 | 109564333 | 21.29          | MYO16               |
|    | chr13 | 62817225  | 62817434  | 62817298  | 20.08          |                     |
|    | chr13 | 35283237  | 35283456  | 35283332  | 19.36          |                     |
|    | chr13 | 74409399  | 74409617  | 74409485  | 19.32          | KLF12               |
|    | chr13 | 76363009  | 76363245  | 76363123  | 19.32          | LMO7                |
|    | chr13 | 40828199  | 40828409  | 40828327  | 18.54          |                     |
|    | chr13 | 34731119  | 34731391  | 34731293  | 18.48          |                     |
|    | chr13 | 107028728 | 107029019 | 107028866 | 17.36          | LINC00460           |
|    | chr13 | 106622260 | 106622468 | 106622374 | 15.42          |                     |
|    | chr13 | 97846794  | 97847067  | 97846891  | 15.41          |                     |
|    | chr13 | 106095373 | 106095631 | 106095514 | 14.64          |                     |
|    | chr13 | 107002625 | 107002926 | 107002749 | 13.43          |                     |
|    | chr13 | 22396412  | 22396734  | 22396591  | 10.62          |                     |
|    | chr13 | 50422188  | 50422505  | 50422342  | 9.70           |                     |
|    | chr13 | 22237485  | 22237692  | 22237610  | 9.68           |                     |
|    | chr13 | 98283519  | 98283771  | 98283672  | 9.48           |                     |

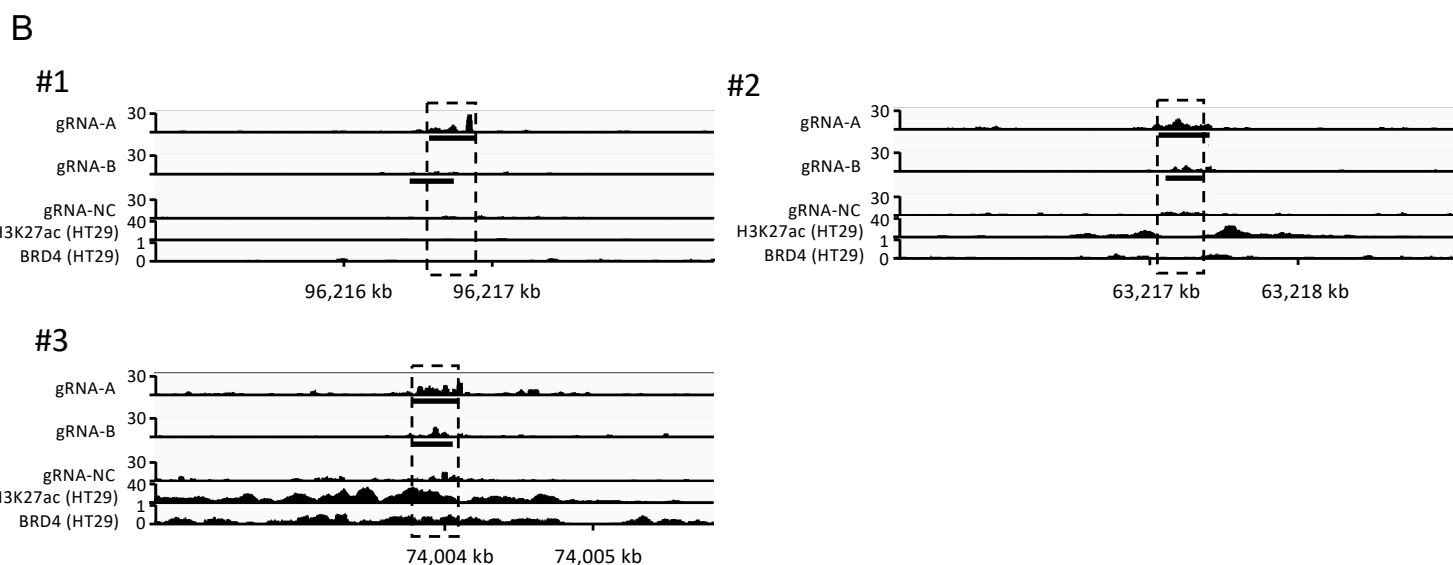

## Supplementary Figure S2.

**A**, List of regions that bind to the *KLF5* promoter by *in vitro* enChIP-seq analysis. The regions of the top 19 highest *P* scores on chromosome 13 are shown. First line shows the *KLF5* promoter region including the target region of two gRNAs.

**B**, IGV track of *in vitro* enChIP-seq peaks and ChIP-seq peaks of H3K27ac (HT29 colon cancer cell line) and BRD4 (HT29 colon cancer cell line) from the CHIP-Atlas database at the #1, #2, #3 region listed in S2A.

# Supplementary Figure S3

A

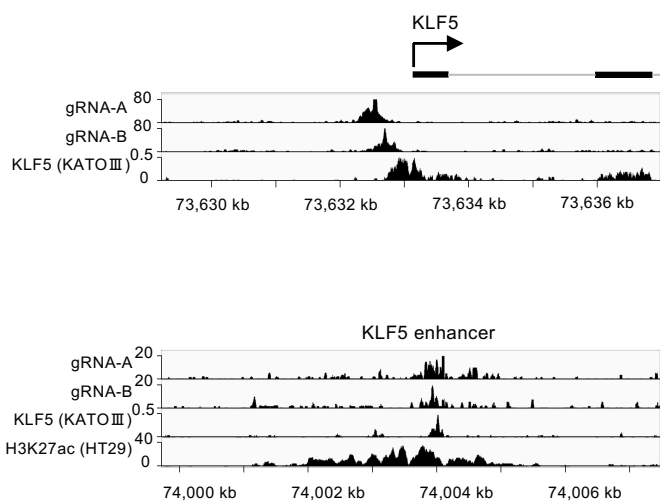

B

KLF5 promoter

| Chr13: 73,632,543-73,633,142 |                |
|------------------------------|----------------|
| Name                         | Relative score |
| KLF15                        | 1.000000005    |
| KLF5                         | 1.000000002    |
| FOXL1                        | 0.993649047    |
| ZNF354C                      | 0.991568145    |
| MEIS1                        | 0.991412464    |
| GSX2                         | 0.988713788    |
| HOXC4                        | 0.988177854    |
| FOXG1                        | 0.986265815    |
| HOXD4                        | 0.984911163    |
| PITX1                        | 0.981303179    |
| RHOXF1                       | 0.9811454      |
| SP9                          | 0.980423467    |
| KLF16                        | 0.978779943    |
| FOXP3                        | 0.978500055    |
| HOXB3                        | 0.978455587    |
| HOXA2                        | 0.977227913    |
| RBPJ                         | 0.977006343    |
| ARNT::HIF1A                  | 0.976049778    |
| PDX1                         | 0.975665978    |
| SP3                          | 0.97287621     |

KLF5 enhancer

| Chr13: 74,003,945-74,004,045 |                |
|------------------------------|----------------|
| Name                         | Relative score |
| NFATC2                       | 1.000000001    |
| MZF1                         | 0.999999979    |
| SPIB                         | 0.975072448    |
| NFATC3                       | 0.950526725    |
| MZF1                         | 0.947676606    |
| SPIB                         | 0.946799076    |
| ZNF354C                      | 0.930628178    |
| BSX                          | 0.928841033    |
| SPIB                         | 0.921871522    |
| FOXO2                        | 0.911041566    |
| LBX1                         | 0.908073129    |
| MEIS1                        | 0.908055285    |
| TP73                         | 0.889692841    |
| NKX2-8                       | 0.887035024    |
| THAP1                        | 0.880695953    |
| MZF1                         | 0.88062981     |
| RHOXF1                       | 0.880219168    |
| RHOXF1                       | 0.880219168    |
| FIGLA                        | 0.879176733    |
| KLF5                         | 0.877911246    |

C

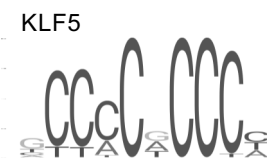

KLF5 promoter

chr13: 73,633,043-73,633,142

GGCCTCGGGGCTCGGGATTCCGCGGCGGCGCTGCCAAT  
CAGGCGATCGGG**CCCCCGCCCC**CCCGGAGTTGGGTGAA  
TAGAGCGGGCGTCAAGTGTCAGT

KLF5 enhancer

chr13: 74,003,945-74,004,045

CTTTCTCCCCTATTTTCACCTCTTCCCAAAGCTTTGCTG  
GGTAACTGGAAAAAGGTGATTCTTCTCA**ACCACCTCT**  
**TGTCTGAACATGCAGCAATG**

RHOXF1

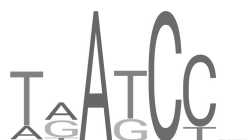

KLF5 promoter

chr13: 73,632,739-73,632,838

AGGTCCTTGACACAACACCTAAGACGTGCAACTACTCTTTT  
CTTC**CTAATCCT**GGCAGAGAACAGTGCGAAGAGATCTCC  
CTCCGCGTCTCCACCCTAATT

KLF5 enhancer

chr13: 74,003,945-74,004,045

CTTTCTCCCCTATTTTCACCTCTTCCCAAAGCTTTGCTG  
GGTAACTGGAAAAAGGTGATTCTTCTCA**AACCAC**CTCT  
TGTCTGAACATGCAGCAATG

MEIS1

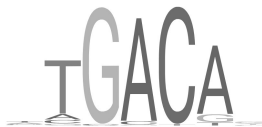

KLF5 promoter

chr13: 73,632,836-73,632,935

ATCCCCCTCTTCCAGATTCCACCCGCTCCGCTACTTCC  
CTCCGCCCGGCTCCGCCAGCCCAAT**CTGTCAG**AGAAG  
TTGTGTACAACTGCGCGGCC

KLF5 enhancer

chr13: 74,003,945-74,004,045

CTTTCTCCCCTATTTTCACCTCTTCCCAAAGCTTTGCTG  
GGTAACTGGAAAAAGGTGATTCTTCTCA**ACCACCTCT**  
**TGTCTGAACATGCAGCAATG**

ZNF354C

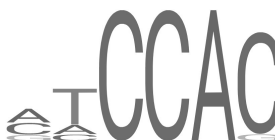

KLF5 promoter

chr13: 73,632,785-73,632,884

AATCCTGGCAGAGAACAGTGCGAAGAGATCTCCCTCCGC  
GT**CTCCAC**CCTAATTCGCCCTCTTCCAGATTCCACCCGC  
TCCGCTACTTCCCTCCGCCCC

KLF5 enhancer

chr13: 74,003,945-74,004,045

CTTTCTCCCCTATTTTCACCTCTTCCCAAAGCTTTGCTG  
GGTAACTGGAAAAAGGTGATTCTTCTCA**AACCAC**CTCT  
TGTCTGAACATGCAGCAATG

## Supplementary Figure S3 continued

D

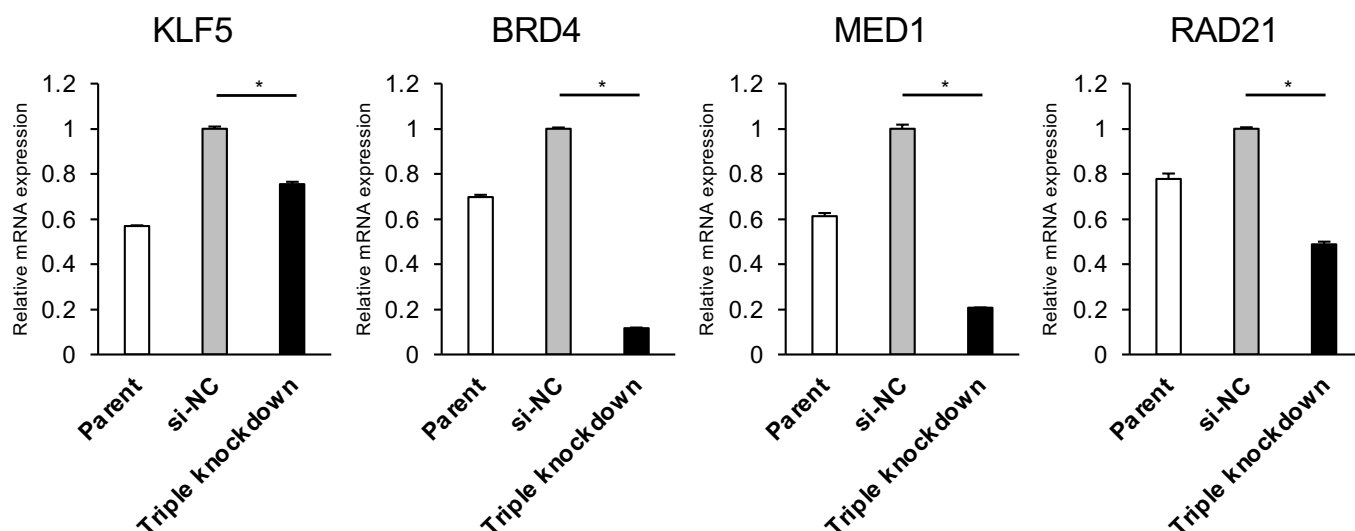

E

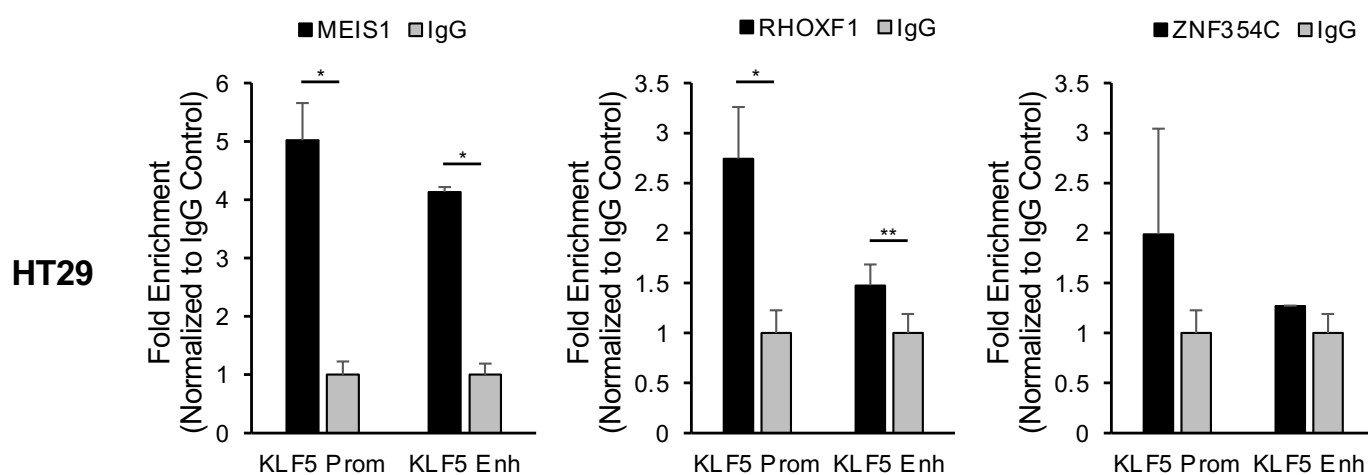

### Supplementary Figure S3.

**A**, IGV track of in vitro enChIP-seq peaks and CHIP-seq peaks of *KLF5* (KATO III gastric cancer cell line) and H3K27ac (HT29 colon cancer cell line) from the CHIP-Atlas database at the *KLF5* promoter (top) and enhancer (bottom).

**B**, List of transcription factors that may bind to the *KLF5* promoter (left) and *KLF5* enhancer (right) predicted by the JASPAR core transcription factor database.

**C**, Sequence of the *KLF5* promoter and enhancer region. The predicted *KLF5*, MEIS1, RHOXF1, ZNF354C binding sequence is shown in bold and underlined. The consensus sequence for *KLF5*, MEIS1, RHOXF1, ZNF354C is also shown at the top.

**D**, Expression level of *KLF5* mRNA in triple knockdown of *BRD4*, *MED1* and *RAD21* in HT29 cells (30nM for each). The relative value is calculated by the expression level of the si-negative control transfected cells (siNC). \* $P < 0.01$

**E**, The binding of the MEIS1, RHOXF1, ZNF354C proteins to the *KLF5* promoter and enhancer in HT29 cell lines analyzed by CHIP-qPCR. Fold enrichment normalized to the value of the IgG control is shown. \* $P < 0.01$ , \*\* $P < 0.05$

# Supplementary Figure S4

A

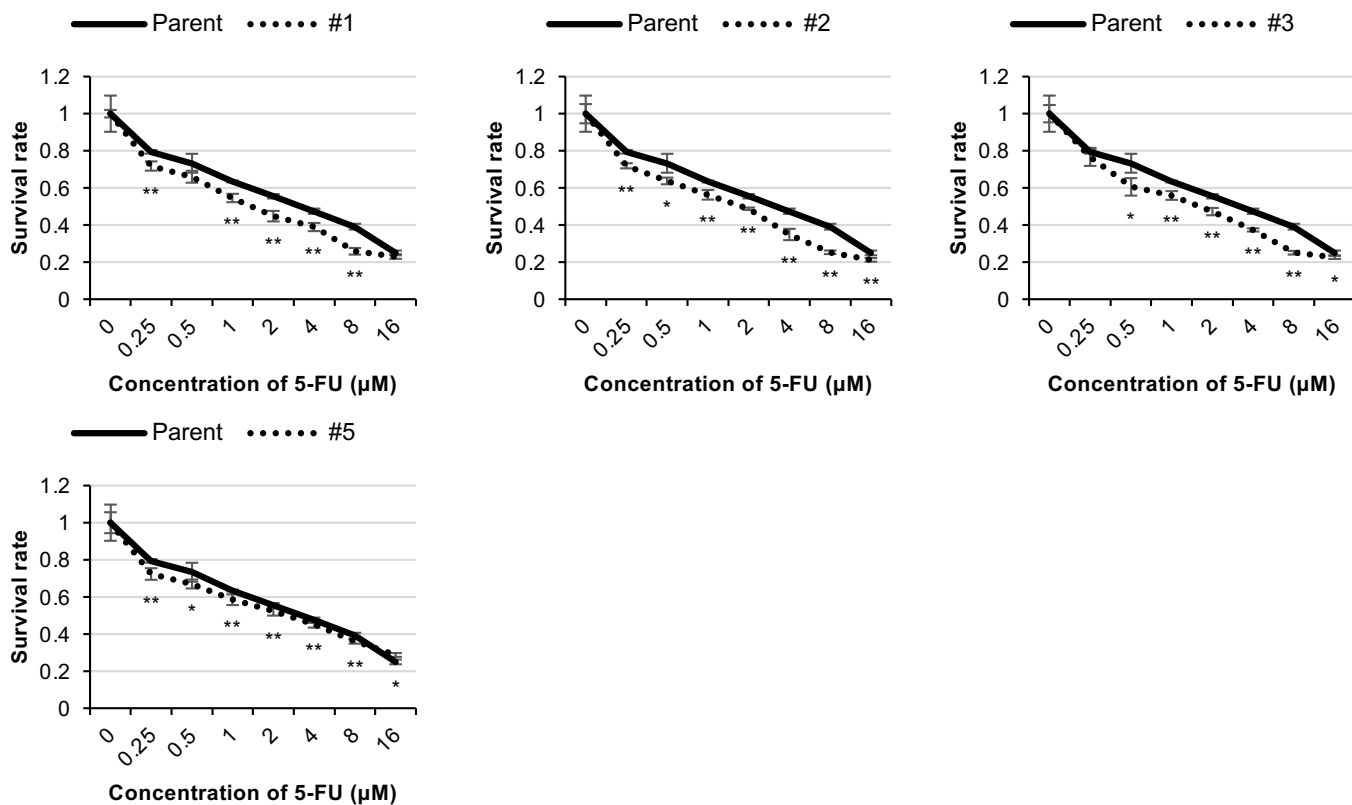

B

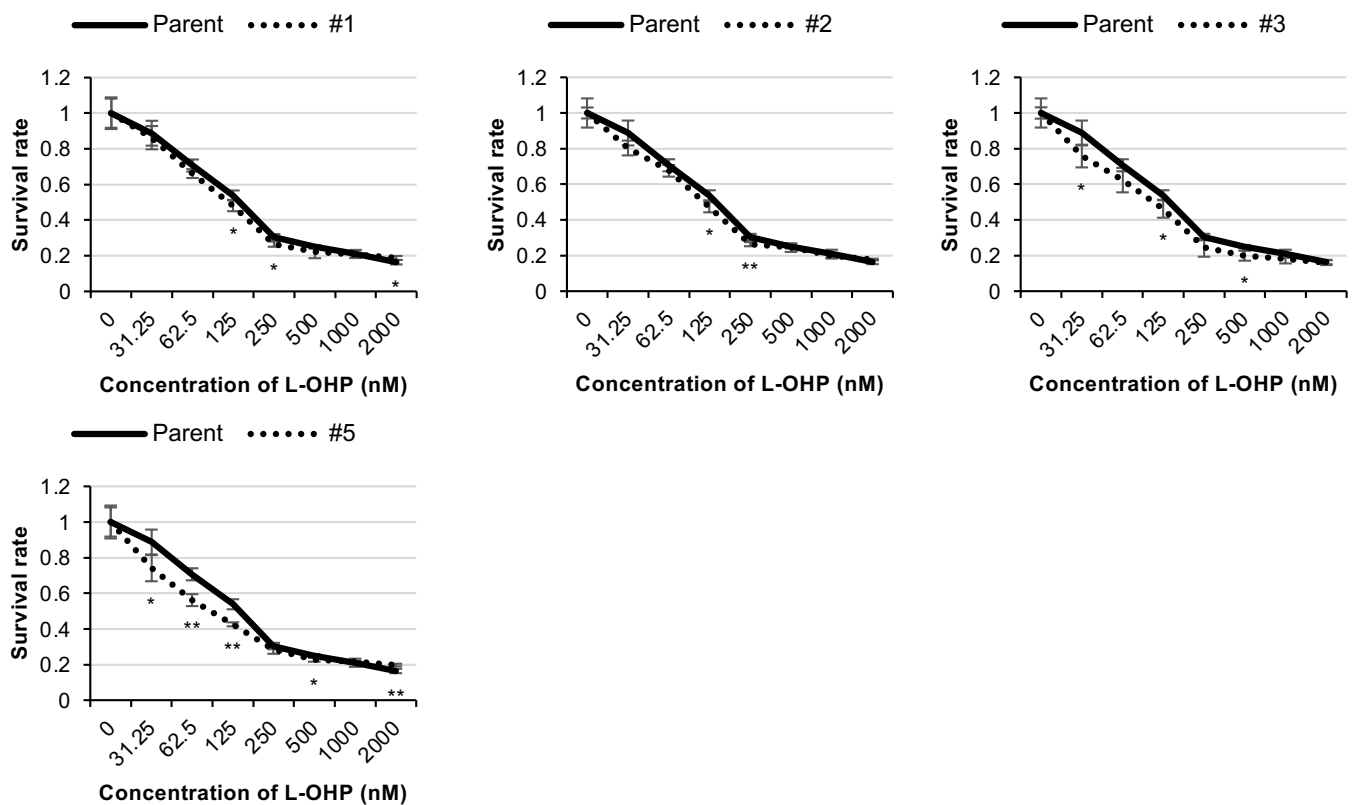

# Supplementary Figure S4

C

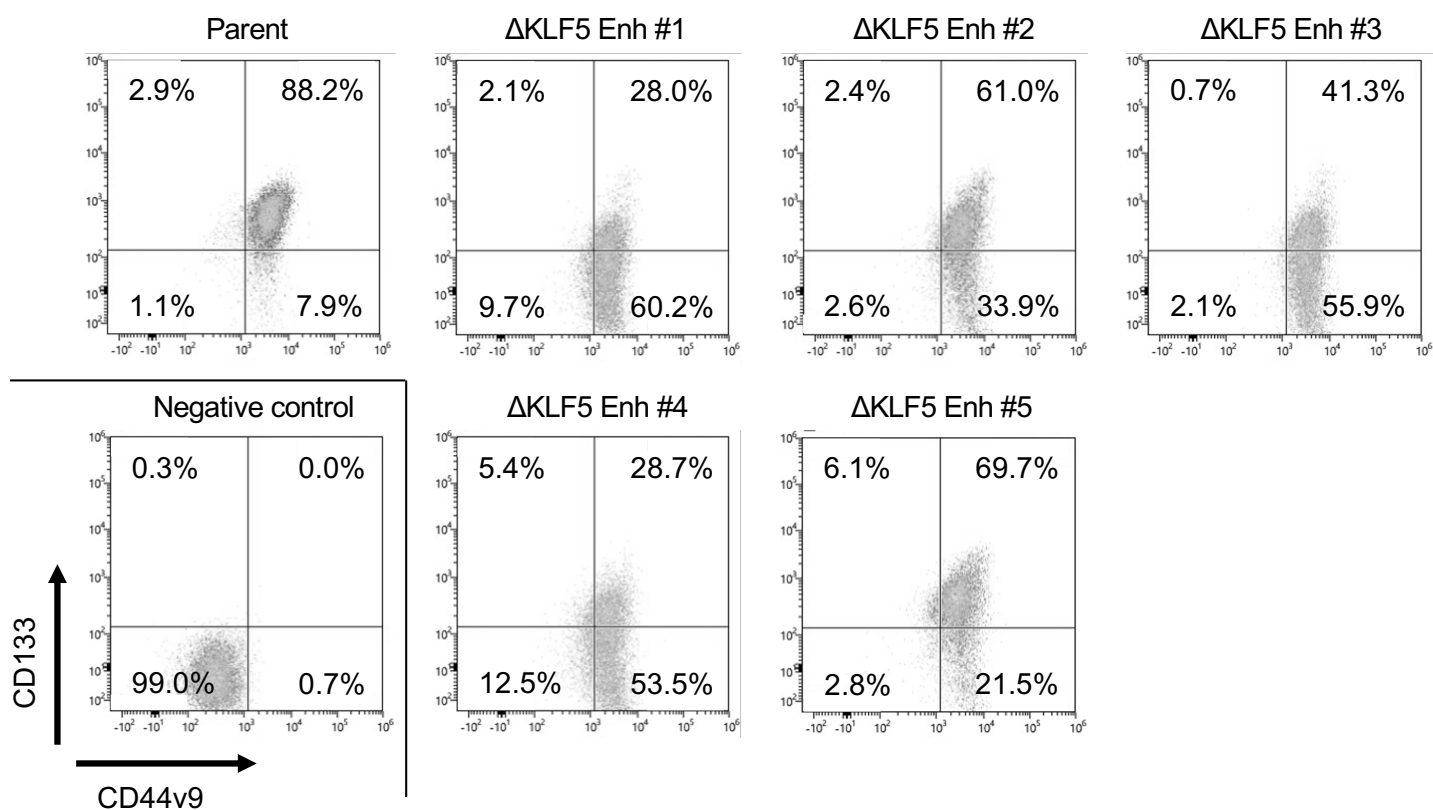

## Supplementary Figure S4.

**A, B,** The survival rate of parental cells and heterodeletion mutants (#1, #2, #3, #5) of the *KLF5* enhancer after 5-FU (A) and L-OHP (B) treatment. \* $P < 0.05$ , \*\* $P < 0.01$

**C,** The expression levels of CD44v9 and CD133 analyzed by flow cytometry in parental cells and five heterodeletion mutants of the *KLF5* enhancer. X-axis shows the level of CD44v9 and Y-axis shows the level of CD133.

# Supplementary Figure S5

A

|    | Chr   | Start     | End       | Summit    | P score | Closest Gene Symbol |
|----|-------|-----------|-----------|-----------|---------|---------------------|
| #1 | chr13 | 73632293  | 73632792  | 73632537  |         | KLF5                |
|    | chr8  | 128231146 | 128231713 | 128231437 | 74.95   | CCAT1               |
| #2 | chr8  | 130709462 | 130709732 | 130709607 | 50.52   |                     |
| #3 | chr5  | 90245615  | 90245941  | 90245779  | 43.36   | GPR98               |
|    | chr8  | 134664222 | 134664538 | 134664399 | 40.78   |                     |
|    | chr17 | 49031649  | 49031935  | 49031811  | 39.01   |                     |
|    | chr7  | 2393986   | 2394299   | 2394130   | 37.54   | EIF3B               |
|    | chr12 | 97962427  | 97962687  | 97962565  | 37.10   |                     |
|    | chr4  | 102614998 | 102615464 | 102615153 | 37.07   |                     |
|    | chr1  | 149658502 | 149658727 | 149658650 | 36.44   |                     |
|    | chr14 | 53925052  | 53925398  | 53925185  | 34.86   |                     |
|    | chr1  | 214120596 | 214120931 | 214120768 | 33.43   | PROX1-AS1           |
|    | chr5  | 55652031  | 55652694  | 55652327  | 32.90   |                     |
|    | chr2  | 47859220  | 47859432  | 47859338  | 32.04   |                     |
|    | chr15 | 96596976  | 96597236  | 96597114  | 31.67   | LOC101927214        |
|    | chr17 | 28113185  | 28113450  | 28113316  | 31.34   | SSH2                |
|    | chr20 | 33349872  | 33350195  | 33349941  | 30.93   | NCOA6               |
|    | chr1  | 59050230  | 59050494  | 59050360  | 30.80   |                     |
|    | chr12 | 27763451  | 27763788  | 27763631  | 30.80   | PPFIBP1             |
|    | chr7  | 30266480  | 30266755  | 30266622  | 30.55   |                     |

B

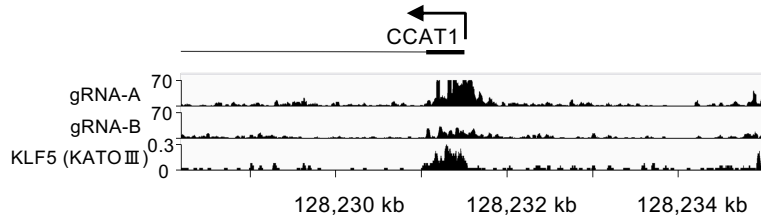

C

CCAT1 TSS

| Chr8: 128,231,387-128,231,487 |                |
|-------------------------------|----------------|
| Name                          | Relative score |
| NKX6-2                        | 0.966311436    |
| NKX6-1                        | 0.962605988    |
| TEAD3                         | 0.953317826    |
| HOXB3                         | 0.946577994    |
| PDX1                          | 0.945168664    |
| NOTO                          | 0.944179531    |
| KLF5                          | 0.944020619    |
| HOXB2                         | 0.943819501    |
| TEAD1                         | 0.94012041     |
| FOXP3                         | 0.935091911    |
| VAX2                          | 0.930021978    |
| HOXA2                         | 0.929447423    |
| BSX                           | 0.929327814    |
| VAX1                          | 0.92804524     |
| TEAD4                         | 0.926144107    |
| GSX1                          | 0.919541727    |
| GSX2                          | 0.916499969    |
| LHX9                          | 0.915621454    |
| MNX1                          | 0.915284221    |
| RHOXF1                        | 0.914474309    |

KLF5

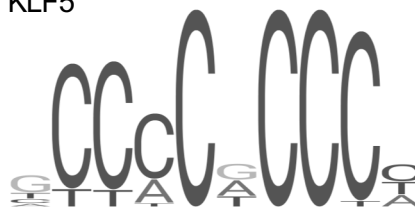

chr8: 128,231,387-128,231,487

AATCTAGAAGA**AGGGAGTGGG**TGAAGAATC  
 CCATTTGTAAAGAGGATAGCAGGTTAATGAA  
 AAGAAGCAGAGGTATGCGTAGGTGATAGTG  
 TTTCTACAAG

D

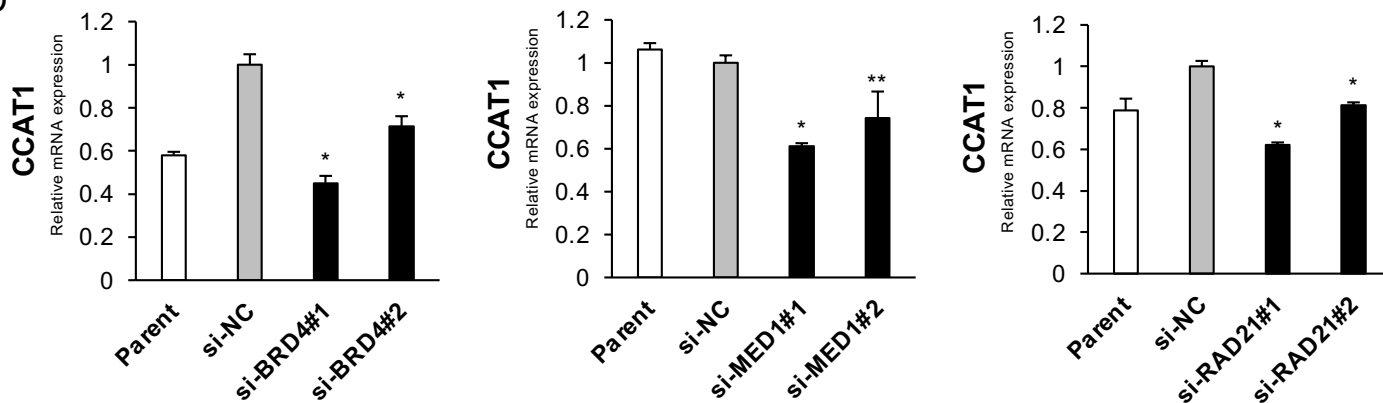

### Supplementary Figure S5.

**A**, List of regions that bind to the *KLF5* promoter by analyzing the *in vitro* enChIP-seq data. The regions of the top 19 highest P scores in all chromosomes are shown. First line shows the *KLF5* promoter region including the target region of two gRNAs.

**B**, IGV track of *in vitro* enChIP-seq peaks and ChIP-seq peak of *KLF5* (KATO III gastric cancer cell line) in the *CCAT1* TSS region from the ChIP-Atlas database.

**C**, List of transcription factors that may bind to the *CCAT1* TSS region predicted by the JASPAR core transcription factor database. The sequence of the *CCAT1* TSS region is also shown. The predicted *KLF5* binding sequence is shown in bold and underlined. The consensus sequence for *KLF5* is also shown.

**D**, Expression level of *CCAT1* RNA in HT29 cells transfected with siRNAs against *BRD4*, *MED1* and *RAD21*. The relative value is calculated by the expression level of the si-negative control transfected cells (siNC). \* $P < 0.01$ , \*\* $P < 0.05$



# Supplementary Figure S6

| KLF5 Expression | CCAT1 Expression |            |            | Total      |
|-----------------|------------------|------------|------------|------------|
|                 | Weak             | Moderate   | Strong     |            |
| Weak            | 0 (0.0 %)        | 1 (5.9 %)  | 0 (0.0 %)  | 1 (5.9 %)  |
| Moderate        | 0 (0.0 %)        | 6 (35.3 %) | 1 (5.9 %)  | 7 (41.2 %) |
| Strong          | 0 (0.0 %)        | 2 (11.8 %) | 7 (41.2 %) | 9 (52.9 %) |
| Total           | 0 (0.0 %)        | 9 (52.9 %) | 8 (47.1 %) | 17         |

*P* = 0.0256

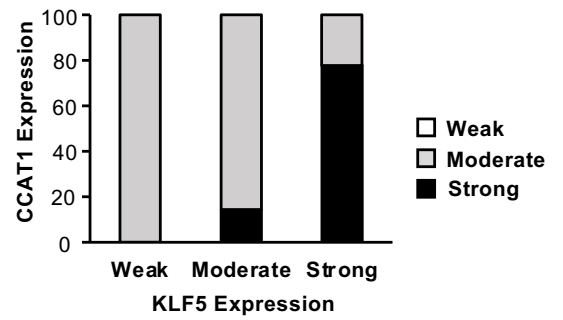

## Supplementary Figure S6.

The percentage of each score (weak, moderate, strong) of KLF5 protein and CCAT1 RNA expression in well differentiated CRC clinical samples. The bar chart is also shown.

# Supplementary Figure S7

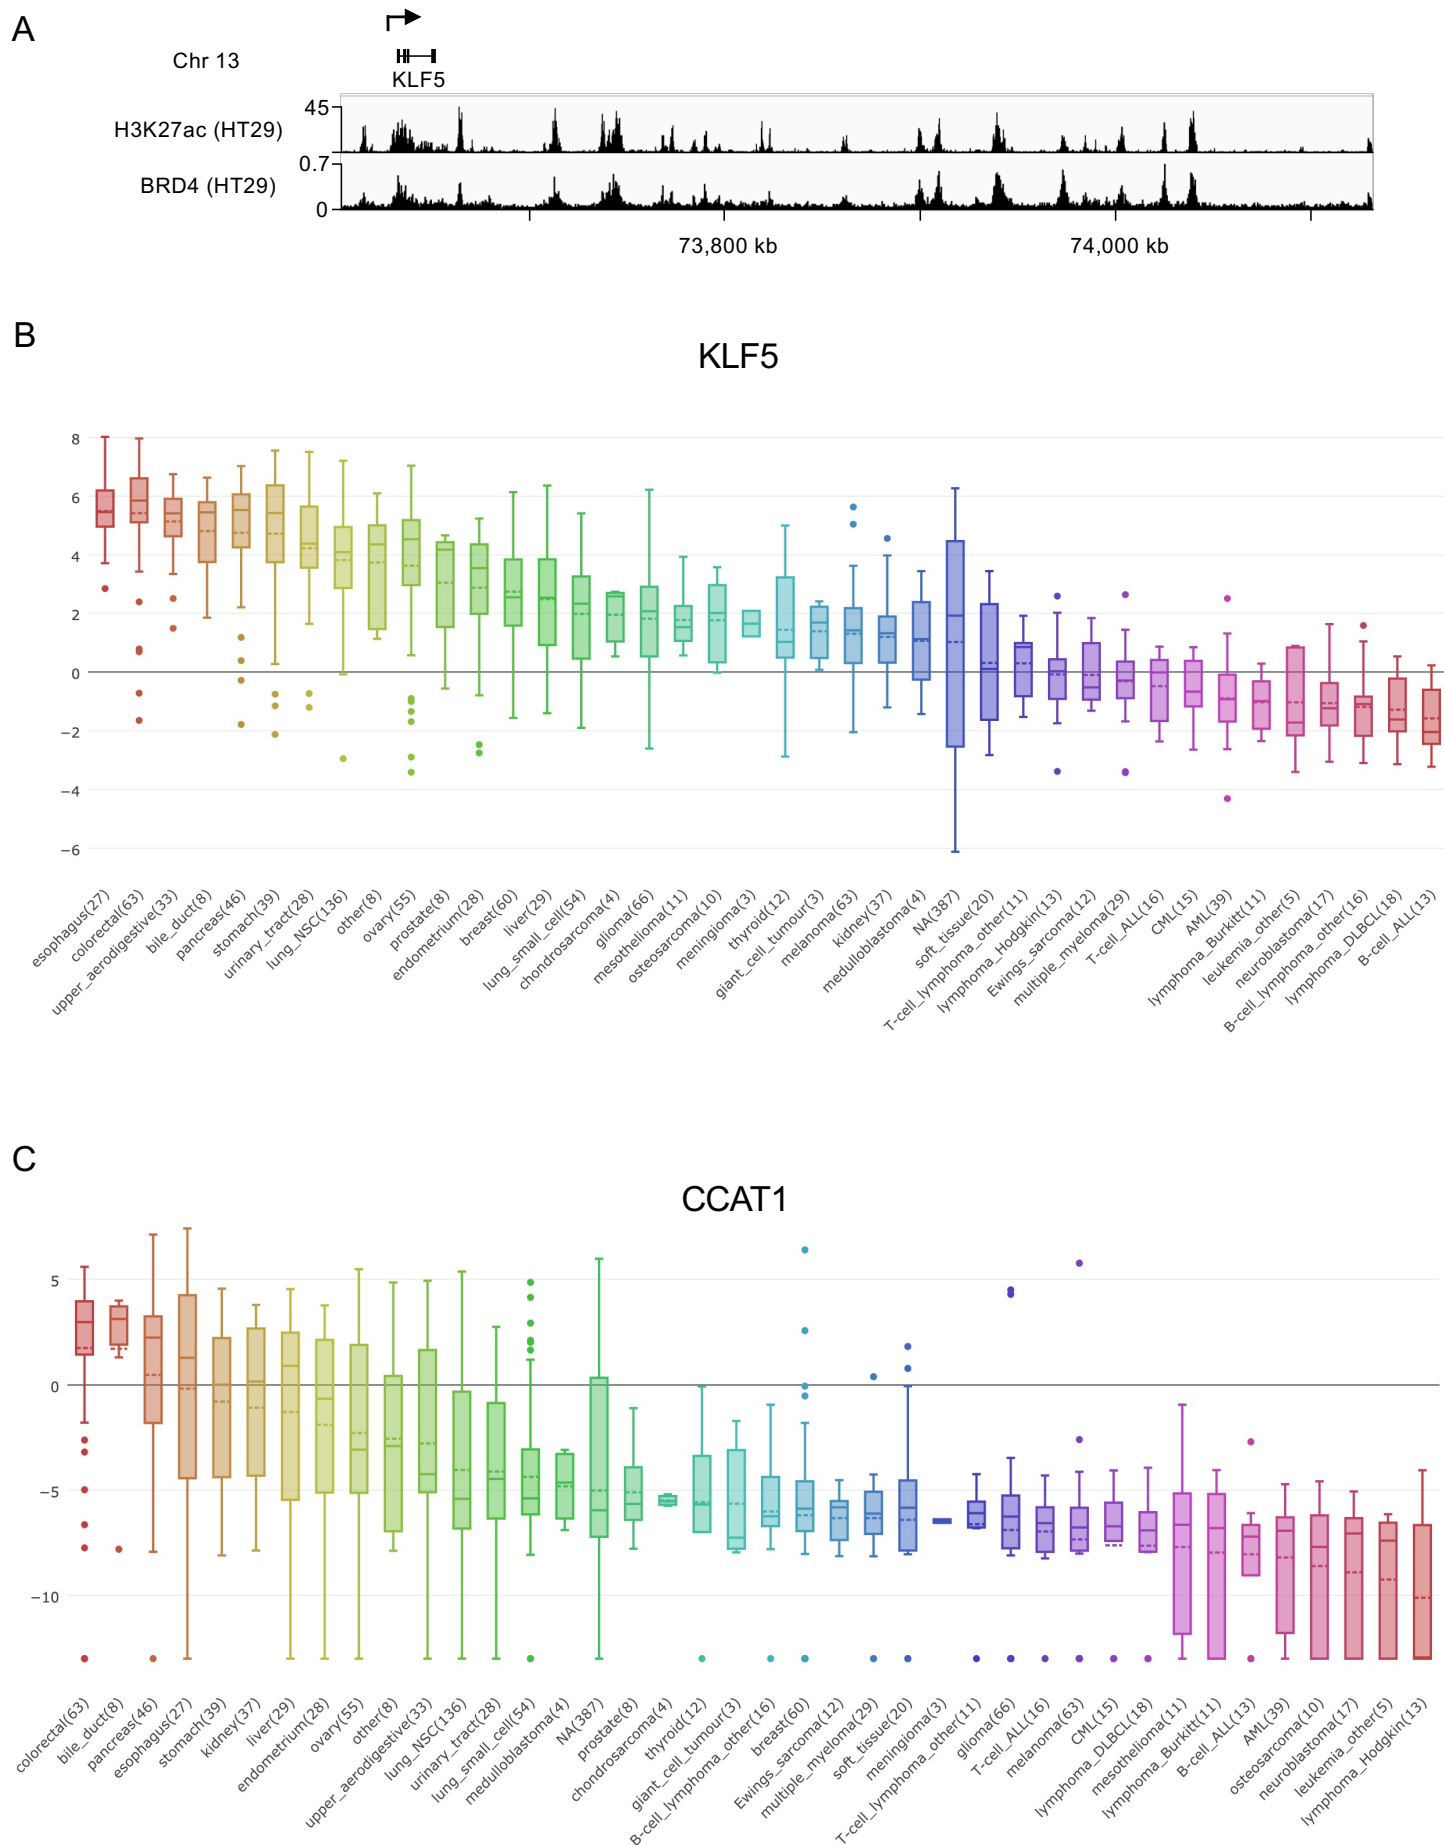

**Supplementary Figure S7.**

**A**, IGV track of CHIP-seq peaks of H3K27ac and BRD4 from the CHIP-Atlas database downstream of the *KLF5* gene in HT29 cells.

**B**, *KLF5* mRNA expression levels in many types of cancer cell lines from the CCLE database. The digit after the name of cancer type indicates the number of cell lines.

**C**, *CCAT1* RNA expression in many types of cancer cell lines from the CCLE database. The digit after the name of cancer type indicates the number of cell lines.

# Supplementary Figure S8

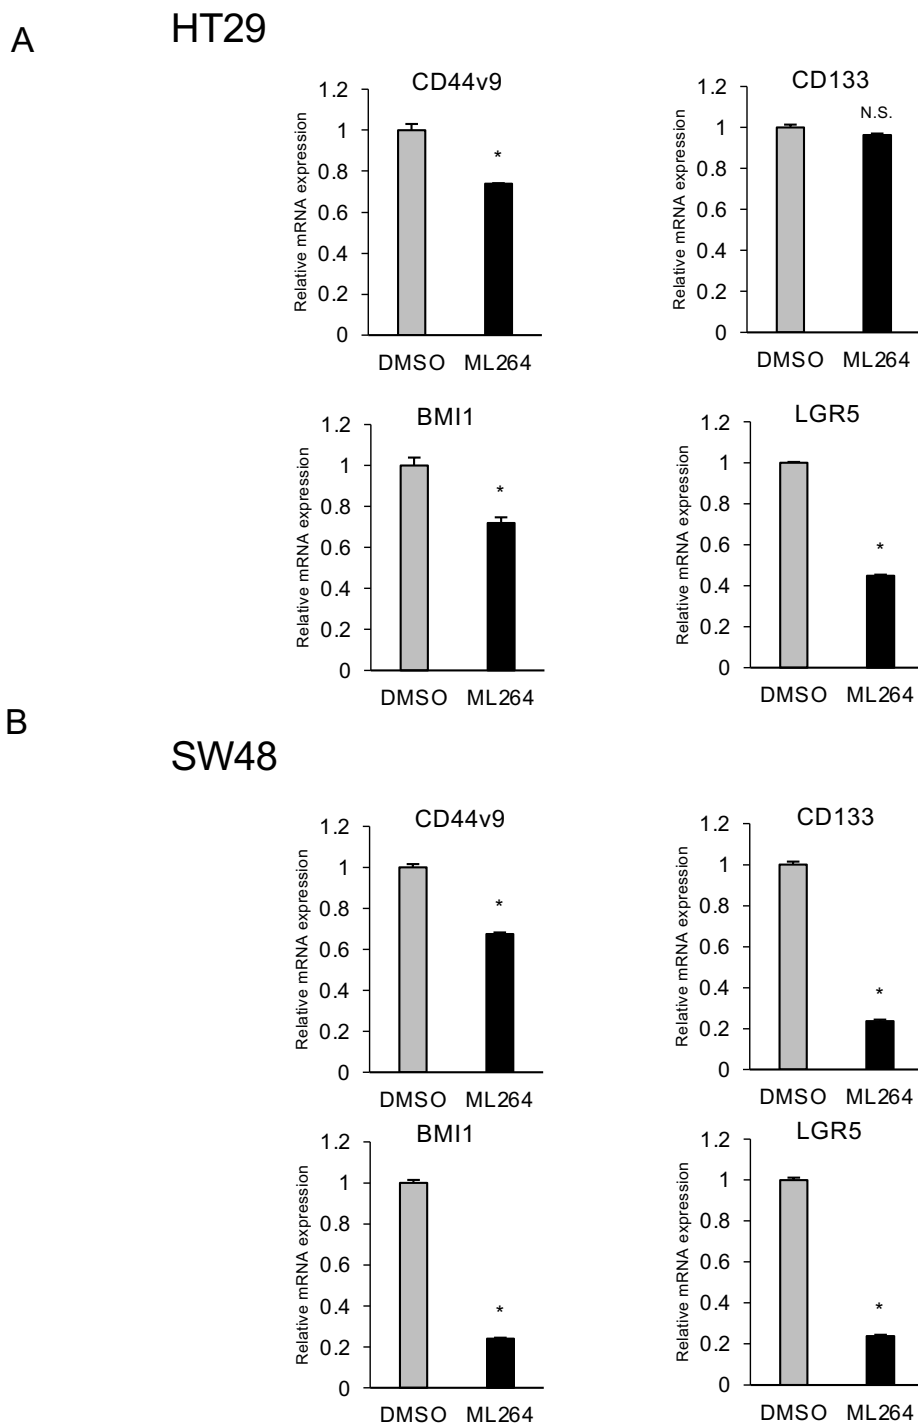

## Supplementary Figure S8.

Expression level of CSC-related genes in ML264-treated cells (HT29 **(A)**, SW48 **(B)**). ML264 was treated for 24 hours. The relative value is calculated by the expression level of DMSO-treated control cells. \* $P < 0.01$ , N.S. = Not significant

# Supplementary Table S1

| Primer sequence for qRT-PCR |                              |
|-----------------------------|------------------------------|
| KLF5_F                      | CCACCACCCTGCCAGTTAAC         |
| KLF5_R                      | TAACTTTTGTGCAACCAGGGTAA      |
| GAPDH_F                     | CAACTACATGGTTTACATGTTC       |
| GAPDH_R                     | GCCAGTGGACTCCACGAC           |
| CCAT1_F                     | AGAAACACTATCACCTACGC         |
| CCAT1_R                     | CTTAACAGGGCATTGCTAATCT       |
| BMI1_F                      | TGTAACACGTGTATTGTTTCGTTAC    |
| BMI1_R                      | CAATATCTTGGAGAGTTTTATCTGACC  |
| LGR5_F                      | CCCTTCATTTCAGTGCAGTGT        |
| LGR5_R                      | AGCAGGTGTTACAGGGTTT          |
| CD44v9_F                    | ATAATGAGCTTCTACATCACATGAAGGC |
| CD44v9_R                    | ATAATGCAGAGTAGAAGTTGTGGATGGT |
| CD133_F                     | TGACAAGCCCATCACAACT          |
| CD133_R                     | CGCCTGAGTCACTACGTTGC         |
| BRD4_F                      | ACCAGTTTGCATGGCCTTT          |
| BRD4_R                      | TTGTTTTCCAAGCGCTTCTT         |
| MED1_F                      | CTGGAACGGCTCCATGCAA          |
| MED1_R                      | CTTCTCCATGACTTGACGCAC        |
| RAD21_F                     | GGATAAGAAGCTAACCAAAGCCC      |
| RAD21_R                     | CTCCCAGTAAGAGATGTCCTGAT      |

| siRNA sequence (5' - 3' sense sequence) |                       |
|-----------------------------------------|-----------------------|
| NC siRNA                                | AUCCGCGCGAUAGUACGUA   |
| BRD4 siRNA#1                            | CGUCCGAUUGAUUUCUCCAA  |
| BRD4 siRNA#2                            | CCUGGAGAUGACAUAGUCUUA |
| MED1 siRNA#1                            | GCUGGUCCUUGGAUAAGA    |
| MED1 siRNA#2                            | CCAGUACAGGUGGAUCUAA   |
| RAD21 siRNA#1                           | GAUGACGACAUGUUAGUAA   |
| RAD21 siRNA#2                           | GGAGCCUAAUUGAUUAACU   |
| KLF5 siRNA#1                            | CGAUUACCCUGGUUGCACA   |
| KLF5 siRNA#2                            | CUAUAAUCCAGAGCAUAA    |
| CCAT1 siRNA#1                           | GGAGGGUGCUUGACAAUAAUU |
| CCAT1 siRNA#2                           | GAGAAGACCAUAGAAGAU    |
| CCAT1 siRNA#3                           | GGAUGGACAUCAGAACUAA   |

## Supplementary Table S1 continued

| Primer sequence for ChIP-qPCR |                      |
|-------------------------------|----------------------|
| KLF5 Promoter ChIP_F          | CTCTCTCCCTGCTCATAGGC |
| KLF5 Promoter ChIP_R          | CCGCGACTACTGACACTTGA |
| KLF5 Enhancer ChIP_F          | CTGAGCTAGGCCCTTTCTT  |
| KLF5 Enhancer ChIP_R          | GCTGCATGTTGAGACAAGGA |
| CCAT1 TSS ChIP_F              | GGGCTTATTGTTGGACAGA  |
| CCAT1 TSS ChIP_R              | CGCTCACGATTCACAGAAAA |

| Oligonucleotide sequence for generation of deletion mutant |                           |
|------------------------------------------------------------|---------------------------|
| KLF5 Enh Left_sense                                        | CACCGGTTTGTGATCGGGTGATCCC |
| KLF5 Enh Left_antisense                                    | AAACGGGATCACCCGATCACAAACC |
| KLF5 Enh Right_sense                                       | CACCGTGAGGGCTCGGTATATTCTT |
| KLF5 Enh Right_antisense                                   | AAACAAGAATATACCGAGCCCTCAC |
| CCAT1 TSS Left_sense                                       | CACCGAAATTGATCTATCGGACCAA |
| CCAT1 TSS Left_antisense                                   | AAACTTGGTCCGATAGATCAATTC  |
| CCAT1 TSS Right_sense                                      | CACCGCAATTAGAAGTAGATCCGTA |
| CCAT1 TSS Right_antisense                                  | AAACTACGGATCTACTTCTAATTGC |

| Primer sequence for validation of deletion mutant |                      |
|---------------------------------------------------|----------------------|
| KLF5 Enh-F1                                       | TCCTAAGCTCTGGCTTCTGC |
| KLF5 Enh-R1                                       | GCCATGAGTGTGAGAATTGC |
| KLF5 Enh-R2                                       | TCATCCCTGTCACCAGATCA |
| CCAT1-F1                                          | CGTCCAACAATGCACAGAAC |
| CCAT1-R1                                          | CCATTCAGTCTCAGGGACA  |
| CCAT1-R2                                          | CTTGGCTTTGGCTTGTCAAT |

| gRNA sequence           |                                                                       |
|-------------------------|-----------------------------------------------------------------------|
| crRNA-A (KLF5 promoter) | GUGAGUGUAUCCGUUUAAACAguuuuagagcuaugcuguuuuug                          |
| crRNA-B (KLF5 promoter) | CCCAGAAGGCAGCUAGGUAGuuuuagagcuaugcuguuuuug                            |
| crRNA-NC (chicken Pax5) | CGGCAGGCUCGGGUGCGCCUuuuuagagcuaugcuguuuuug                            |
| tracrRNA                | AAACAGCAUAGCAAGUUAAAAUAAGGCUAGUCCGUUAUCAACUUGAAAAAGUGGCACCGAGUCGGUGCU |

### Supplementary Table S1.

List of primers, siRNA, oligonucleotides and gRNAs.

## Supplementary Table S2

| Characteristics                       | Total<br>n = 131 | KLF <sup>LOW</sup><br>n =66 | KLF <sup>HIGH</sup><br>n =65 | P-value |
|---------------------------------------|------------------|-----------------------------|------------------------------|---------|
| Male/female                           | 72/59            | 32/34                       | 40/25                        | 0.1611  |
| Location, Right/Left                  | 42/89            | 17/49                       | 25/40                        | 0.1369  |
| CEA (ng/mL), median                   | 5.1 (0.9-10943)  | 4.7 (1.0-233.7)             | 7.3 (0.9-10943)              | 0.0690  |
| CA19-9 (U/mL), median                 | 13 (0-22358)     | 13 (0-889)                  | 12 (0-22358)                 | 0.1815  |
| Histologic type (tub/por · muc · sig) | 127/4            | 65/1                        | 62/3                         | 0.3653  |
| Lymph invasion (-/+)                  | 35/96            | 18/48                       | 17/48                        | 1.0000  |
| Venous invasion (-/+)                 | 50/81            | 26/40                       | 24/41                        | 0.8577  |
| Tumor invasion (T0-3/T4)              | 63/68            | 34/32                       | 29/36                        | 0.4859  |
| Lymph node metastasis (-/+)           | 64/67            | 28/38                       | 36/29                        | 0.1634  |
| Curability (curative/non-curative)    | 114/17           | 61/5                        | 53/12                        | 0.0736  |

### Supplementary Table S2.

Comparison of patients' background stratified by *KLF5* mRNA expression in CRC clinical samples. No significant differences are observed between two groups.
